# Supplementary material for: Modeling the Effects of Morphine on Simian Immunodeficiency Virus Dynamics
Source: PLOS journal article supplement (doi:10.1371/journal.pcbi.1005127), 2016-09-26
Supplement: S2 (10.1371/journal.pcbi.1005127.s002) [file journal.pcbi.1005127.s002]

## **Text S2. Analyses of immune response models with cytolytic or non-cytolytic effects**

We consider the basic viral dynamics model with uninfected target cells,  $T$ , infected target cells,  $I$ , and free virus particles,  $V$ . We then introduce a population of effector cells,  $E$ , that can act via cytolytic or non-cytolytic mechanisms. We model the cytolytic effect by increasing infected cell killing at a rate proportional to the size of the effector cell population, i.e. we replace  $\delta \rightarrow \delta + \delta_E E$ . Thus the cytolytic immune response model (CIR model) is

$$\begin{aligned} \frac{dT}{dt} &= \lambda - dT - \beta VT, & T(0) &= T_0, \\ \frac{dI}{dt} &= \beta VT - (\delta + \delta_E E)I, & I(0) &= I_0, \\ \frac{dV}{dt} &= pI - cV, & V(0) &= V_0, \\ \frac{dE}{dt} &= \frac{\xi I}{K+I} E - d_E E, & E(0) &= E_0. \end{aligned}$$

Here,  $\delta_E$  is the rate of infected cell killing by effector cells. The effector cells are stimulated proportionally to  $I$  and  $E$ , with a rate constant  $\xi$  and with a saturation function dependent on the level of infected cells with a half-maximal stimulation threshold  $K$ .  $d_E$  represents the loss rate of effector cells.

Similarly, we model the non-cytolytic effect by decreasing the rate of viral production by infected cells, i.e. we use  $p \rightarrow p/(1 + p_E E)$ , where  $p_E$  is a scaling factor. Thus the non-cytolytic immune response model (NIR model) is

$$\begin{aligned} \frac{dT}{dt} &= \lambda - dT - \beta VT, & T(0) &= T_0, \\ \frac{dI}{dt} &= \beta VT - \delta I, & I(0) &= I_0, \\ \frac{dV}{dt} &= \frac{p}{1 + p_E E} I - cV, & V(0) &= V_0, \\ \frac{dE}{dt} &= \frac{\xi I}{K+I} E - d_E E, & E(0) &= E_0. \end{aligned}$$

We fitted the CIR model, NIR model, and TCS model (target cell population switch model) to the viral load and CD4 data from the morphine and control groups. For model comparison we computed the small sample size corrected Akaike's information criterion (AICc) using the formula

$$AIC_C = N \ln \frac{J}{N} + \frac{2N(N_p + 1)}{N - N_p - 2}$$

where  $J$ ,  $N$  and  $N_p$  are, respectively, the sum of the squared residuals, the number of data points and the number of parameters estimated in each case. For the CIR model, the fitted parameters are  $\lambda, \beta, \delta, \delta_E, \xi, K$  and  $d_E$ , while for the NIR model, the fitted parameters are  $\lambda, \beta, \delta, p_E, \xi, K$  and

$d_E$ . We also tested a model with  $K = 0$ , which did not provide good fits. As we describe in detail in the main text, the fitted parameters in the TCS model are  $\lambda$ ,  $\beta_l$ ,  $\beta_h$ ,  $\delta$ ,  $r$ ,  $q$ . The other parameters ( $d$ ,  $c$ , and  $p$ ) were fixed at the same values in all models (see main text), and in the immune models  $E_0=500 \text{ ml}^{-1}$ . The best fits of the models are shown in Fig. 1\_S2\_Text,  $AIC_C$  values are given in Table 1\_S2\_Text, and the best fit parameters for the immune models are shown in Table 2\_S2\_Text and Table 3\_S2\_Text. The  $AIC_C$  values show that the TCS model is preferred over the CIR and NIR models. Moreover, as seen in the figure below, the structure of the immune response models leads to much poorer fits.

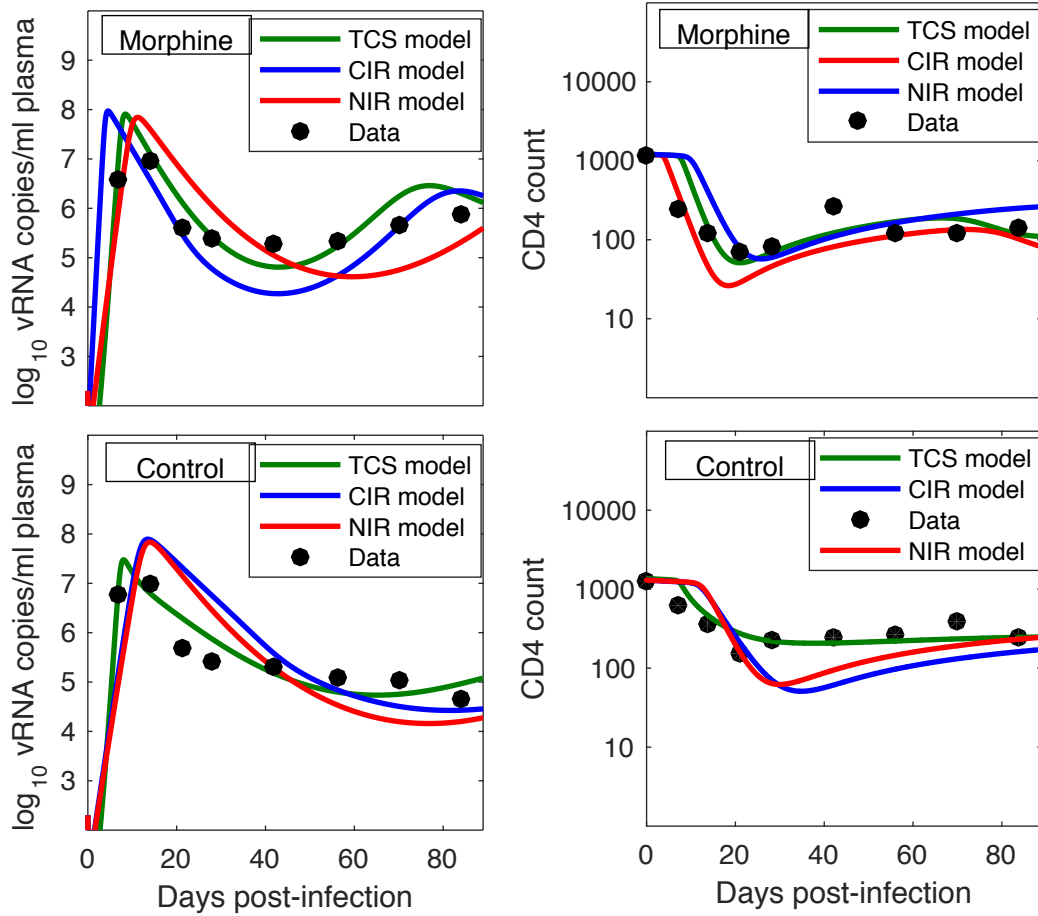

**Figure 1\_S2\_Text.** Best-fit viral load (left column) and CD4 count (right column) dynamics predicted by the models (lines) along with the mean  $\log_{10}$  viral load and CD4+ T-cell count data (circles) for the morphine group (first row) and the control group (second row).

We also plot the dynamics of  $\delta_E E$  predicted by the CIR model (Fig. 2\_S2\_Text). In both the morphine and control groups,  $\delta_E E$  is much smaller than the value of  $\delta$ . Similarly, predictions of the NIR model show that the magnitude of  $p_E E$  is much smaller than 1 (Fig. 2\_S2\_Text).

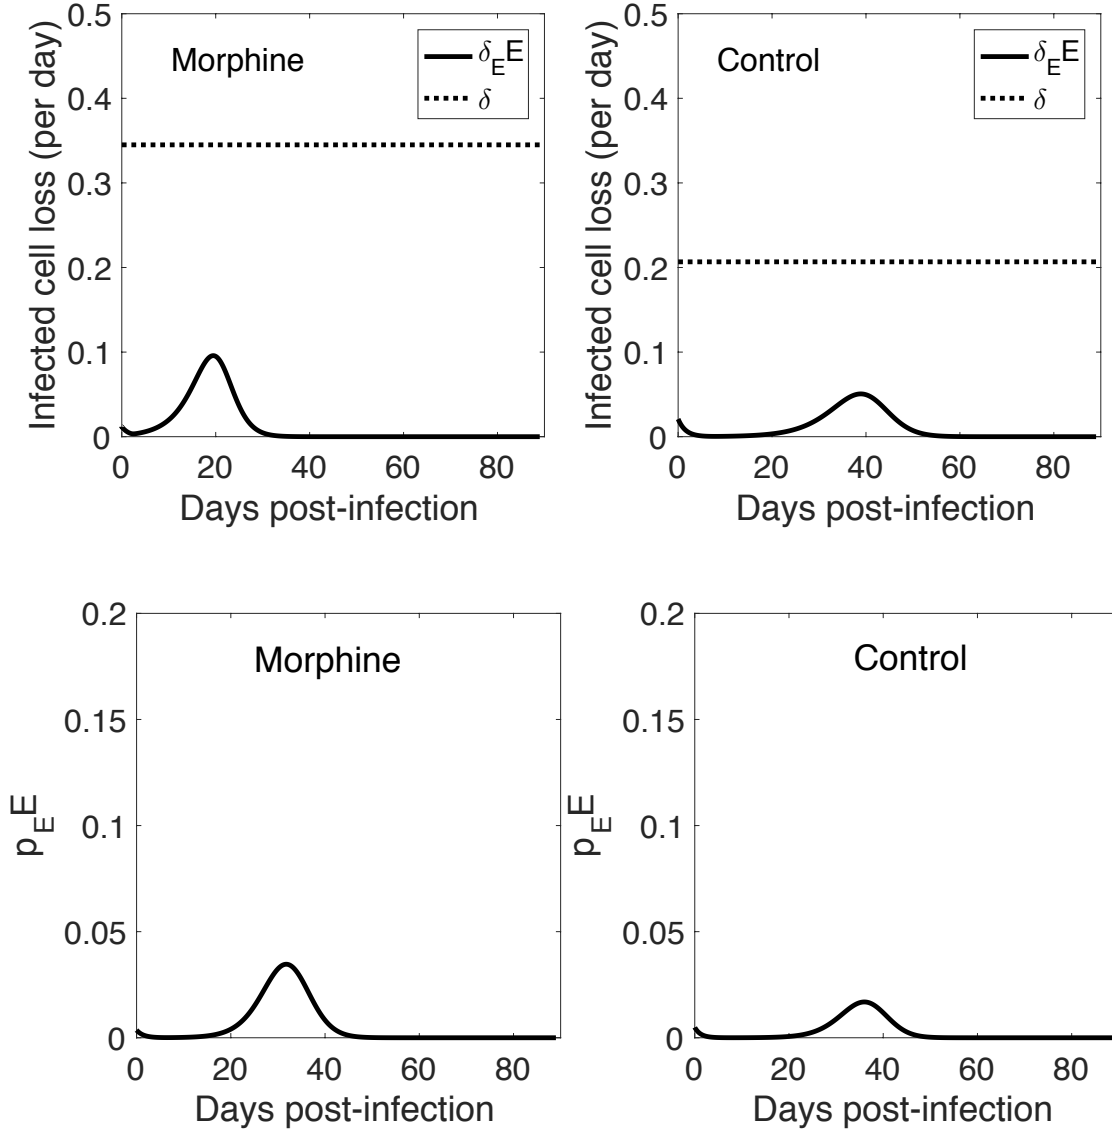

**Figure 2\_S2\_Text.** First row (CIR model): Dynamics of the per capita infected cell killing due to effector cell,  $\delta_E E$ , and the per capita infected cell death,  $\delta$ . Second row (NIR model): Dynamics of reduction in viral production,  $p_E E$ .

In addition to fitting the two groups separately, we also fitted the CIR and NIR models to both morphine and control groups together. In this case, we allowed only the immune response related parameters to be different between the groups, keeping the other parameters the same in both groups. We have a larger data set with the two groups combined allowing us to fit a larger number of parameters. The parameters fitted were  $\lambda, \beta, \delta, \delta_E^M, \xi^M, K^M, d_E^M, \delta_E^C, \xi^C, K^C, d_E^C$  for the CIR model and  $\lambda, \beta, \delta, p_E^M, \xi^M, K^M, d_E^M, p_E^C, \xi^C, K^C, d_E^C$  for the NIR model. Superscripts  $M$  and  $C$  stand for morphine and control, respectively. The best fit of the models to the viral load and CD4 data for both groups are shown in Fig. 3\_S3\_Text, and the  $AIC_C$  and the sum of squared residual (SSR) values are given in Table 1\_S2\_Text. Neither the  $AIC_C$  nor SSR value was

improved with this approach, further supporting that the immune response is not significantly different between the two groups of monkeys.

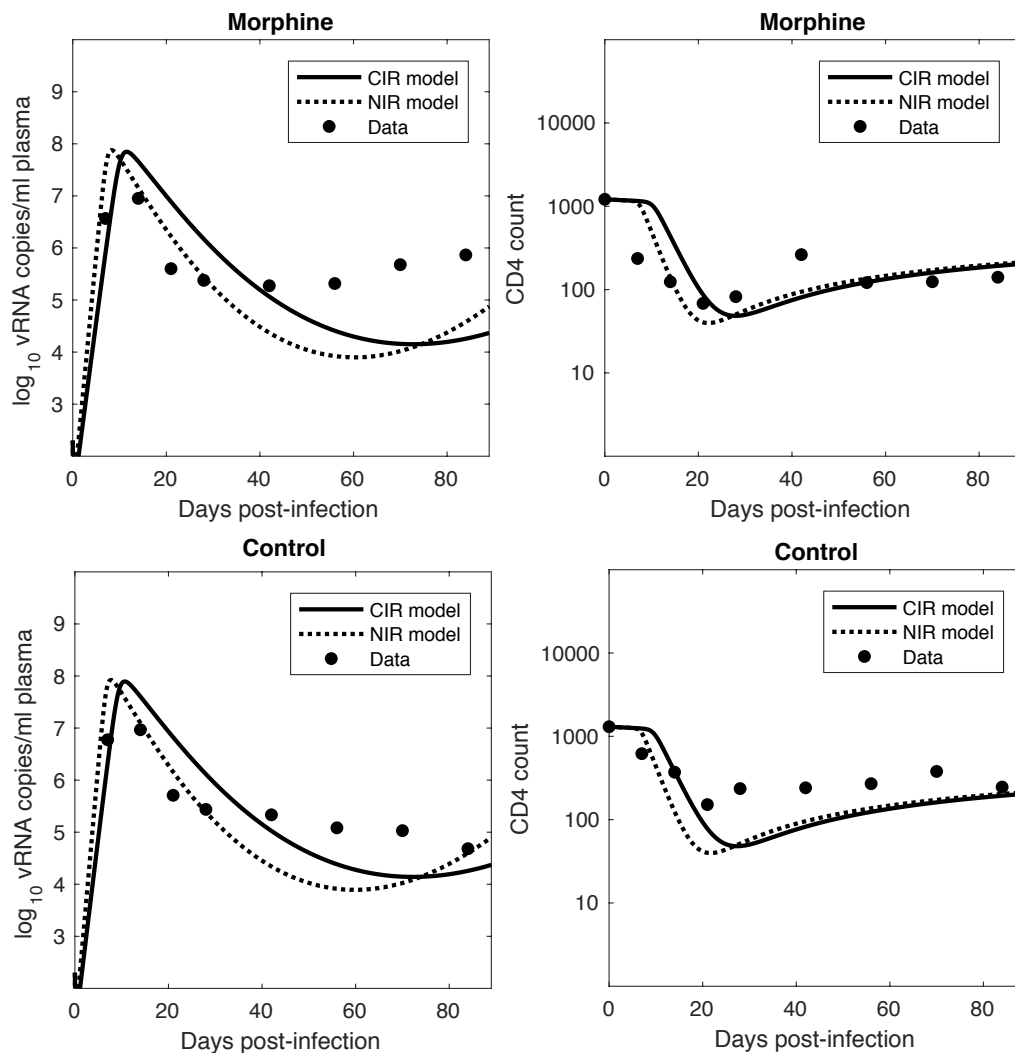

**Figure 3\_S2\_Text.** Fitting of CIR and NIR models to morphine and control groups data together. Best-fit viral load (left column) and CD4 count (right column) dynamics predicted by the models (lines) along with the mean  $\log_{10}$  viral load and CD4 count data (filled small circles) for the morphine group (first row) and the control group (second row).

**Table 1\_S2\_Text:**

**Akaike's information criteria ( $AIC_c$ ) and sum of squared residuals (SSR) for model fits to the data.**

| Model     | Morphine Group |         | Control Group |         | Both Groups Together |         |
|-----------|----------------|---------|---------------|---------|----------------------|---------|
|           | SSR            | $AIC_c$ | SSR           | $AIC_c$ | SSR                  | $AIC_c$ |
| CIR model | 4.12           | 14.97   | 9.24          | 27.80   | 15.12                | 16.42   |
| NIR model | 5.32           | 18.95   | 8.99          | 27.36   | 15.45                | 17.12   |
| TCS model | 2.02           | -5.07   | 1.04          | -15.59  | N/A                  | N/A     |

**Table 2\_S2\_Text: Estimated parameters for CIR model.**

| Parameters | Morphine              | Control               |
|------------|-----------------------|-----------------------|
| $\lambda$  | 3280                  | 3700                  |
| $\beta$    | $3.83 \times 10^{-8}$ | $1.21 \times 10^{-8}$ |
| $\delta$   | 0.37                  | 0.20                  |
| $\delta_E$ | $2.34 \times 10^{-5}$ | $4.17 \times 10^{-5}$ |
| $\xi$      | 0.86                  | 0.83                  |
| $K$        | 100                   | 99                    |
| $d_E$      | 0.61                  | 0.63                  |

**Table 3\_S2\_Text: Estimated parameters for NIR model.**

| Parameters | Morphine              | Control               |
|------------|-----------------------|-----------------------|
| $\lambda$  | 5440                  | 5080                  |
| $\beta$    | $1.57 \times 10^{-8}$ | $1.20 \times 10^{-8}$ |
| $\delta$   | 0.30                  | 0.28                  |
| $p_E$      | $7.22 \times 10^{-6}$ | $9.78 \times 10^{-6}$ |
| $\xi$      | 1.03                  | 1.11                  |
| $K$        | 106                   | 95                    |
| $d_E$      | 0.71                  | 0.80                  |
